# Supplementary material for: Use of Sodium-Glucose Cotransporter-2 Inhibitors in Clinical Practice for Heart Failure Prevention and Treatment: Beyond Type 2 Diabetes. A Narrative Review
Source: PubMed Central journal article supplement — Adv Ther. 2021 Dec 9;39(2):845–61. doi: 10.1007/s12325-021-01989-z (PMC8866261; doi:10.1007/s12325-021-01989-z), 2021-12-09
Supplement: 12325_2021_1989_MOESM1_ESM.pdf [file 12325_2021_1989_MOESM1_ESM.pdf]

## **SUPPLEMENTARY MATERIAL**

### **Use of Sodium–Glucose Cotransporter-2 Inhibitors in Clinical Practice for Heart Failure Prevention and Treatment: Beyond Type 2 Diabetes**

Shaline Rao

NYU Langone Medical Center, New York City, NY, USA

#### **Corresponding author:**

Shaline Rao, MD

Division of Cardiology, Department of Medicine

NYU Langone Medical Center

530 First Avenue

Skirball 9N

New York, NY 10016, USA

Tel: 646-501-0119; Fax: 646-501-0145

Email: [Shaline.Rao@nyulangone.org](mailto:Shaline.Rao@nyulangone.org)

**Supplementary Table S1.** Key ongoing and recently completed (data publication pending)

clinical studies investigating the effect of sodium–glucose cotransporter-2 inhibitors on heart failure outcomes

| <b>Study name<br/>(Clinical trial<br/>identifier)</b> | <b>Patient<br/>population</b>                   | <b>Treatment</b>         | <b>Primary outcome</b>                                                                                            | <b>Estimated study<br/>completion date</b> |
|-------------------------------------------------------|-------------------------------------------------|--------------------------|-------------------------------------------------------------------------------------------------------------------|--------------------------------------------|
| DELIVER<br>(NCT03619213)                              | HFpEF ( <i>n</i> = 4700)                        | Dapagliflozin vs placebo | Composite of CV death, HHF, or urgent HF visit                                                                    | January 2022                               |
| DAPA ACT HF-TIMI 68 (NCT04363697)                     | HFrEF (post HF) ( <i>n</i> = 2400)              | Dapagliflozin vs placebo | Time to CV death or worsening HF                                                                                  | May 2023                                   |
| Dapagliflozin Heart Failure Readmission (NCT04249778) | HFrEF +/- T2D (post HF) ( <i>n</i> = 392)       | Dapagliflozin vs placebo | Composite of hospital admissions, ED visits, urgent clinic visits, and death after admission for decompensated HF | December 2023                              |
| DAPA-MI (NCT04564742)                                 | HFrEF (post MI) ( <i>n</i> = 6400)              | Dapagliflozin vs placebo | Composite of HHF or CV death                                                                                      | June 2023                                  |
| EMPULSE (NCT04157751)                                 | HFrEF or HFpEF ( <i>n</i> = 500)                | Empagliflozin vs placebo | Composite of death, number of HFE, time to first HFE, and change in KCCQ TSS                                      | Completed (data release pending)           |
| EMPACT-MI (NCT04509674)                               | Post MI with high risk of HF ( <i>n</i> = 3312) | Empagliflozin vs placebo | Composite of time to first HHF or all-cause mortality                                                             | December 2022                              |

CV cardiovascular, *DAPA ACT HF-TIMI 68* Dapagliflozin and Effect on Cardiovascular Events in Acute Heart Failure - Thrombolysis in Myocardial Infarction 68, *DAPA-MI* Dapagliflozin Effects on Cardiovascular Events in Patients with an Acute Heart Attack, *DELIVER* Dapagliflozin Evaluation to Improve the Lives of Patients with Preserved Ejection Fraction Heart Failure, *ED* emergency department, *EMPACT-MI* Study to Test Whether Empagliflozin Can Lower the Risk of Heart Failure and Death in People Who Had a Heart Attack (Myocardial Infarction), *EMPULSE* A Study to Test the Effect of Empagliflozin in Patients Who Are in Hospital for Acute Heart Failure, *HF* heart failure, *HFpEF* heart failure with preserved ejection fraction, *HFrEF* heart failure with reduced ejection fraction, *HFE* heart failure event, *HHF* hospitalization for heart failure, *KCCQ TSS* Kansas City Cardiomyopathy Questionnaire Total Symptom Score, *MI* myocardial infarction, *T2D* type 2 diabetes, *vs* versus
